# Supplementary material for: Herring Milt Protein Hydrolysate Improves Insulin Resistance in High-Fat-Diet-Induced Obese Male C57BL/6J Mice
Source: PubMed Central journal article supplement (PMC6724050; doi:10.3390/md17080456), 2019-08-03
Supplement: marinedrugs-17-00456-s001.pdf [file marinedrugs-17-00456-s001.pdf]

## Supplementary materials

**Table S1.** Diet composition and calorie information

| Ingredient <sup>#</sup>               | LFC* | HFC  | HPH15 | HPH35 | HPH70 |
|---------------------------------------|------|------|-------|-------|-------|
| Diet composition                      |      |      |       |       |       |
| Casein (80 Mesh)                      | 200  | 200  | 170   | 130   | 60    |
| L-Cystine                             | 3    | 3    | 3     | 3     | 3     |
| Corn Starch                           | 315  | 0    | 0     | 0     | 0     |
| Maltodextrin 10                       | 35   | 125  | 125   | 125   | 125   |
| Sucrose                               | 350  | 68.8 | 68.8  | 68.8  | 68.8  |
| Herring Milt Hydrolysate              | 0    | 0.00 | 42.4  | 98.9  | 197.7 |
| Cellulose, BW200                      | 50   | 50   | 50    | 50    | 50    |
| Lard (96%)                            | 20   | 245  | 240.4 | 234.3 | 223.6 |
| Soybean Oil                           | 25   | 25   | 25    | 25    | 25    |
| Mineral Mix S10026                    | 10   | 10   | 10    | 10    | 10    |
| DiCalcium Phosphate                   | 13   | 13   | 13    | 13    | 13    |
| Calcium Carbonate                     | 5.5  | 5.5  | 5.5   | 5.5   | 5.5   |
| Potassium Citrate, 1 H <sub>2</sub> O | 16.5 | 16.5 | 16.5  | 16.5  | 16.5  |
| Vitamin Mix V10001                    | 10   | 10   | 10    | 10    | 10    |
| Choline Bitartrate                    | 2    | 2    | 2     | 2     | 2     |
| FD&C Blue Dye #1                      | 0.05 | 0.05 | 0.05  | 0.05  | 0.05  |
| Total                                 | 1055 | 774  | 782   | 792   | 810   |
| Calorie information                   |      |      |       |       |       |
| Protein (% kcal)                      | 20   | 20   | 20    | 20    | 20    |
| Fat (% kcal)                          | 10   | 60   | 60    | 60    | 60    |
| Carbohydrate (% kcal)                 | 70   | 20   | 20    | 20    | 20    |
| Energy density (kcal/g)               | 3.82 | 5.21 | 5.21  | 5.21  | 5.21  |

\*LFC, low-fat diet; HFC, high-fat diet; HPH15, HPH35 and HPH70, HFC with 15%, 35% and 70% casein replaced, respectively, by the same amount of protein from herring milt protein hydrolysate.

<sup>#</sup>Diet formulae of LFC and HFC and the ingredients were obtained from the Research Diets, New Brunswick, NJ, USA.
